# Supplementary material for: Vitamin B12 impacts amyloid beta-induced proteotoxicity by regulating the methionine/S-adenosylmethionine cycle
Source: PubMed Central journal article supplement — Cell Rep. Author manuscript; Available in PMC 2021 Oct 18. (PMC8522492; doi:10.1016/j.celrep.2021.109753), 2021-09-28
Supplement: NIHMS1744535-supplement-1.pdf [file NIHMS1744535-supplement-1.pdf]

**Cell Reports, Volume 36**

**Supplemental information**

**Vitamin B<sub>12</sub> impacts amyloid beta-induced  
proteotoxicity by regulating the  
methionine/S-adenosylmethionine cycle**

**Andy B. Lam, Kirsten Kervin, and Jessica E. Tanis**

# Supplemental Figure 1

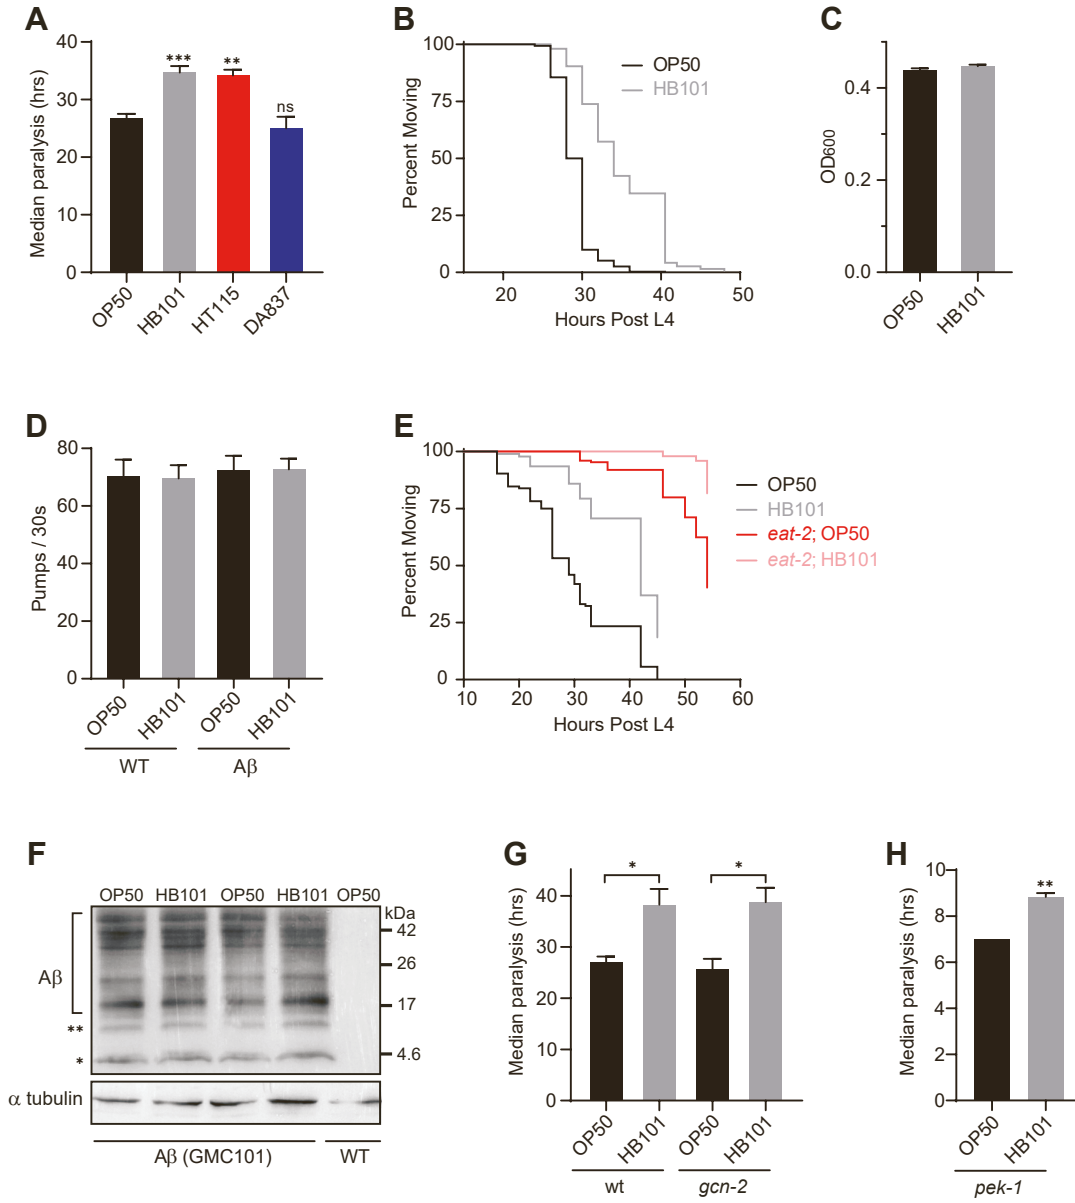

**Supplemental Figure 1: The impact of diet on A $\beta$ -induced paralysis is not due to dietary restriction or differences in A $\beta$  accumulation, related to Figure 1.**

- (A) Median time to paralysis for A $\beta$  animals fed OP50 (black), HB101 (grey), HT115 (red), and DA837 (blue) *E. coli* ( $n \geq 3$ ; one-way ANOVA with Dunnett's post-test).
- (B) Dietary protective effects were not limited to the GMC101 A $\beta$ -expressing strain. CL4176 nematodes, which also express A $\beta$  in the body wall muscles, paralyzed slower when fed HB101 (grey) compared to OP50 (black;  $n \geq 260$ ).
- (C) OD<sub>600</sub> measurements showed no significant difference in bacterial growth between OP50 (black) and HB101 (gray) indicating that the A $\beta$  nematodes were exposed to the same amount of bacteria when grown on these diets ( $n=9$ ; ns two-tailed t-test with Welch's correction).
- (D) Pharyngeal pumping rates were not different between WT and A $\beta$  nematodes raised on OP50 (black) and HB101(gray) bacteria ( $n \geq 25$ ; ns, one-way ANOVA with Dunnett's post-test).
- (E) Loss of *eat-2(ad465)* delayed A $\beta$ -induced paralysis in animals grown on OP50 (red) and HB101 (pink), but HB101 still caused a delay ( $n \geq 49$ ).
- (F) As in Figure 1D, two additional Western replicates presented here showed no effect of diet on A $\beta$  accumulation; five biological replicates performed in total. A $\beta$  signal is detected in GMC101 A $\beta$  animals, but not in the wild type (WT). The A $\beta$  monomer (•), assembles into dimers (••) and higher order oligomers (bracket).
- (G) Two mutants were used to determine if repression of protein synthesis is required for the HB101 protective effect. The GCN-2 kinase phosphorylates elongation initiation factor 2 alpha (eIF2 $\alpha$ ) during times of nutrient deprivation and mitochondrial stress (Baker *et al.* 2012; Rousakis *et al.* 2013). Loss of *gcn-2(ok871)* in A $\beta$  animals raised on either diet did not affect median time to paralysis ( $n=4$ ; one-way ANOVA with Dunnett's post-test).
- (H) In response to misfolded protein accumulation, the endoplasmic reticulum UPR sensor PEK-1 phosphorylates eIF2 $\alpha$  (Shen *et al.*, 2005). Loss of *pek-1(ok275)* accelerated A $\beta$ -induced paralysis, but HB101 still caused a delay compared to OP50 ( $n=3$ ; two-tailed t-test with Welch's correction).

Error bars show SEM; \*\* $p < 0.01$ , \*\*\* $p < 0.001$ .

## Supplemental Figure 2

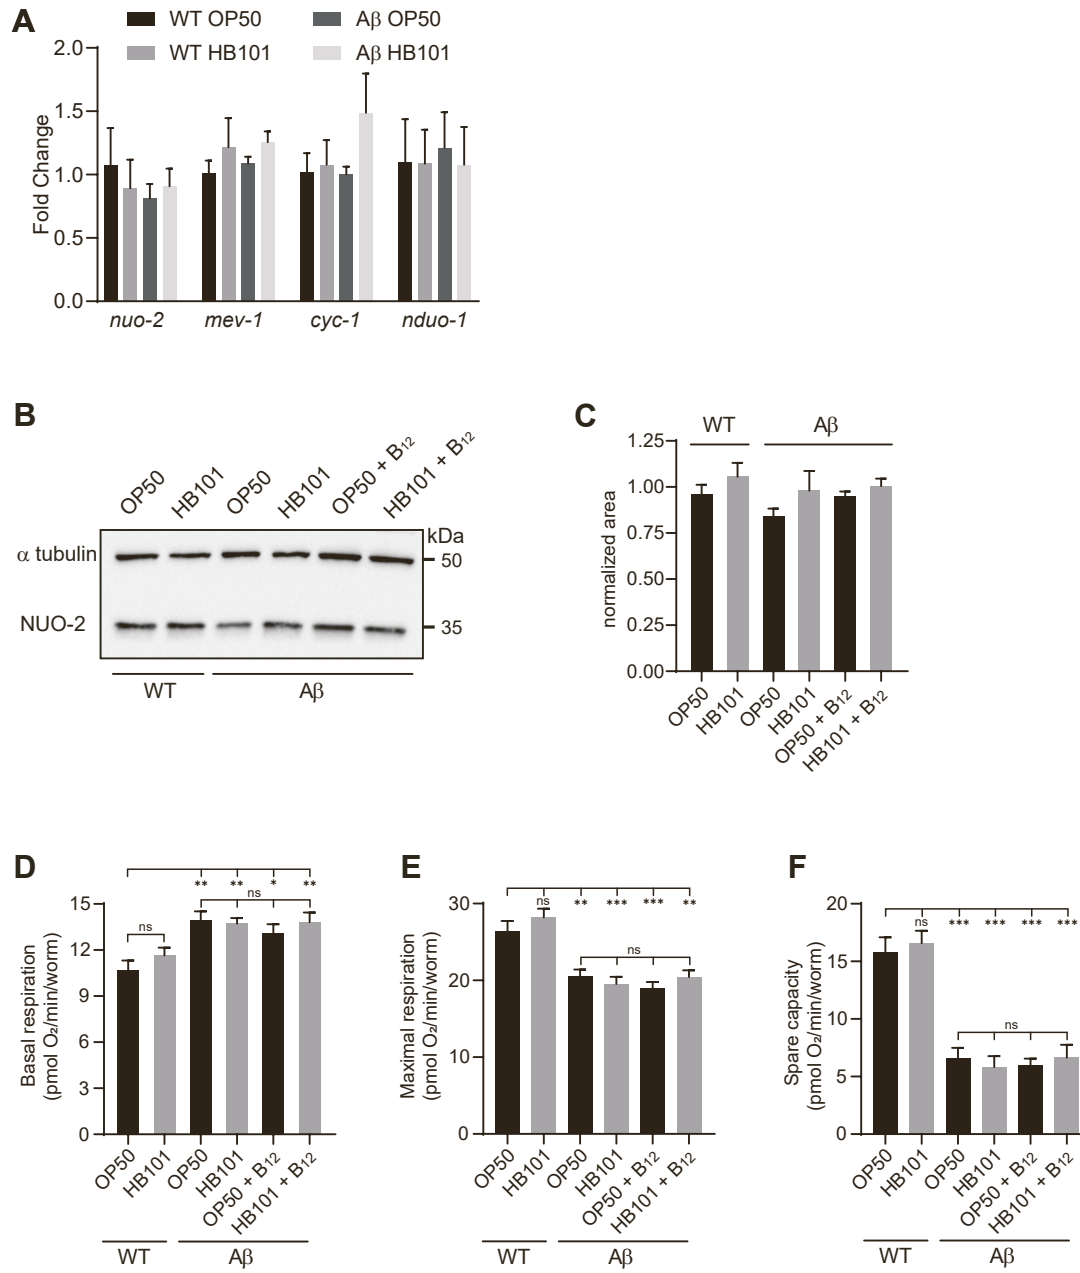

**Supplemental Figure 2: Diet has no impact on oxidative phosphorylation gene transcript levels, mitochondrial protein content, or respiration, related to Figures 1 and 2.**

- (A) qRT-PCR analysis of transcripts from representative genes required for oxidative phosphorylation ( $n \geq 3$ ). No significant differences were observed between wild type and A $\beta$  animals grown on the two different diets. Error bars represent SEM.
- (B) Western analysis of NUO-2, a component of mitochondrial complex I; the  $\alpha$ -tubulin control was detected on the same blot as NUO-2.
- (C) Quantification of NUO-2 signal, normalized to the  $\alpha$ -tubulin control from the same blot. There was no significant difference in NUO-2 protein between animals grown on OP50 and HB101, with or without vitamin B<sub>12</sub> supplementation. Analysis was performed using Image J on five biological replicates, all run on different gels.
- (D) Different parameters of mitochondrial respiration analyzed in wild type and A $\beta$  animals with a Seahorse XFe96 Analyzer. For each condition,  $n \geq 18$  wells with 10-18 animals per well. Diet had no impact on basal respiration, however A $\beta$  expression did cause an increase in oxygen consumption under basal conditions. The ATP synthase inhibitor oligomycin works poorly in *C. elegans*, thus it is not possible to determine if the increased oxygen consumption in A $\beta$  animals results from a change in ATP production linked respiration or an increase in proton leak.
- (E) Addition of FCCP dissipates the proton gradient and causes a collapse of the mitochondrial membrane potential, causing complex IV oxygen consumption to reach a maximal rate as cells try to re-establish the proton gradient. While diet had no effect on maximal respiration, A $\beta$  expression resulted in significantly lower oxygen consumption following FCCP exposure.
- (F) Spare respiratory capacity, determined as the difference between the basal and maximal respiration states, was significantly reduced in A $\beta$  animals. *E. coli* diet and vitamin B<sub>12</sub> had no impact on spare capacity.

Error bars show SEM; \*\* $p < 0.01$ , \*\*\* $p < 0.001$ , one-way ANOVA with Dunnett's post-test.

## Supplemental Figure 3

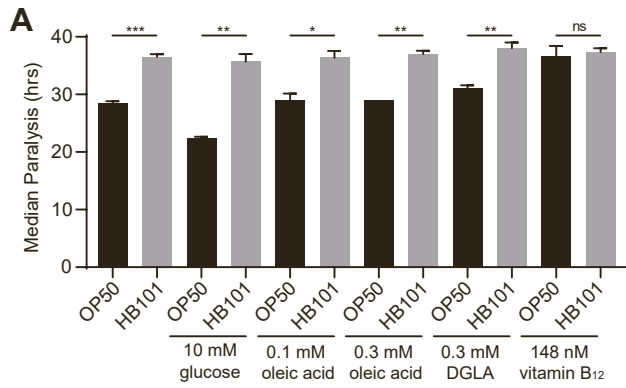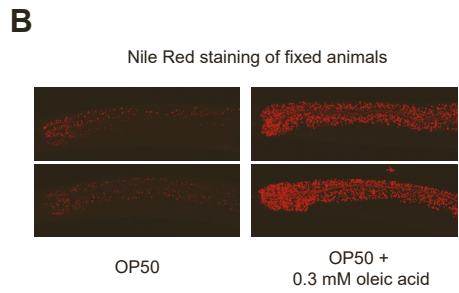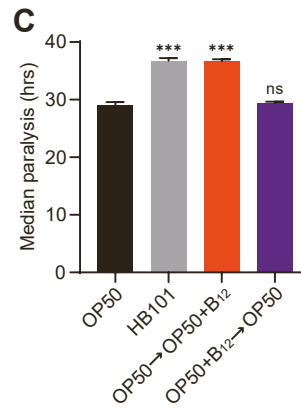

**Supplemental Figure 3: Dietary vitamin B<sub>12</sub> in adulthood delays A $\beta$ -induced paralysis, related to Figure 2.**

- (A) Median time to paralysis for A $\beta$  nematodes fed either OP50 (black) or HB101 (grey) on NGM plates with glucose, oleic acid, dihomo-gamma-linoleate (DGLA), vitamin B<sub>12</sub>, or no supplementation (n $\geq$ 3; one-way ANOVA without correction for multiple comparisons).
- (B) Nile Red staining of paraformaldehyde-fixed animals. Supplementation with 0.3 mM oleic acid increased the intensity of Nile-Red stained droplets, which has been shown to correlate with an increase in triacylglycerol stores.
- (C) Median time to paralysis for A $\beta$  nematodes fed OP50 without supplementation (black) or with B<sub>12</sub> introduced (orange) or removed (purple) at the end of the L4 stage; compare to those given the OP50 diet (n=3; one-way ANOVA with Dunnett's post-test)

Error bars show SEM; \*p<0.05, \*\*p<0.01, \*\*\*p<0.001.

## Supplemental Figure 4

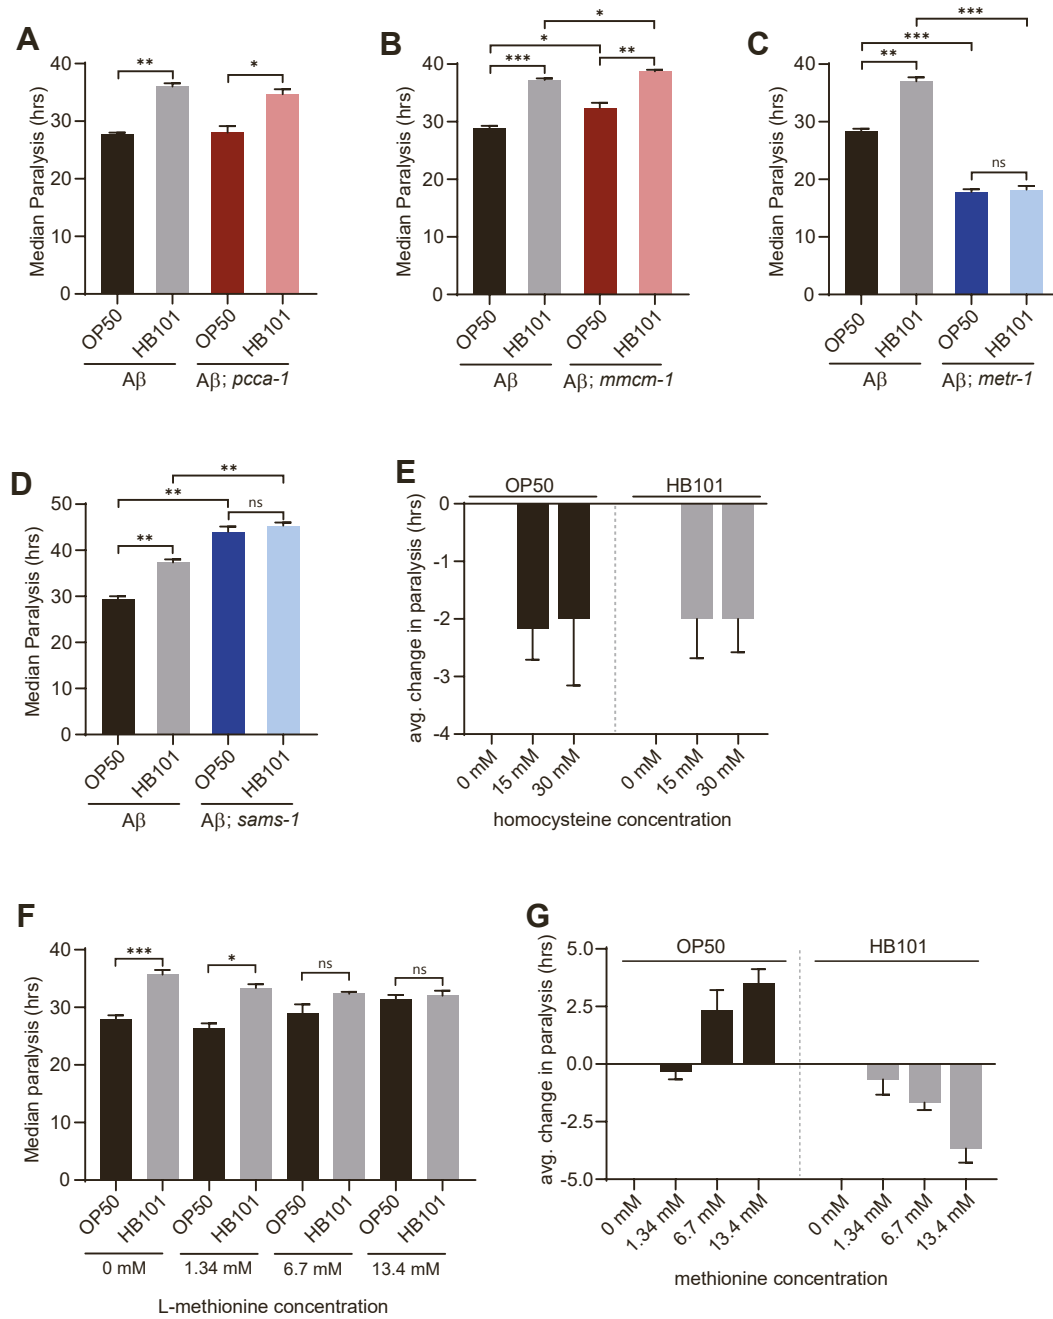



**Supplemental Figure 4: B<sub>12</sub> deficiency causes defects in the methionine/SAM cycle, related to Figures 3 and 4.**

- (A) Loss of *pcca-1* had no impact on the median time to paralysis for A $\beta$  animals grown on OP50 or HB101 (n=3).
- (B) Median time to paralysis for A $\beta$  animals grown on OP50 or HB101 was delayed by loss of *mmcm-1*, however, the diet-induced shift was not affected (n=5).
- (C) Median time to paralysis was not significantly different between A $\beta$ -expressing *metr-1* mutants raised on OP50 or HB101 (n=5).
- (D) Loss of *sams-1* eliminated the impact of diet on median time to paralysis in A $\beta$  animals (n=3).
- (E) Average change in median time to paralysis (hrs) for A $\beta$  nematodes on plates supplemented with 15 mM or 30 mM homocysteine compared to the respective diet controls (n=3).
- (F) Dose-dependent effects of 1.34 mM, 6.7 mM and 13.4 mM L-methionine supplementation on A $\beta$  animals (n $\geq$ 3).
- (G) Average change in median time to paralysis for A $\beta$  animals grown on plates supplemented with 1.34 mM, 6.7 mM, or 13.4 mM L-methionine (n $\geq$ 3).

Error bars show SEM; \*p<0.05, \*\*p<0.01, \*\*\*p<0.001, one-way ANOVA with Dunnett's post-test.
